# Supplementary material for: Spatial Multiomic Profiling Identifies Metabolic and Inflammatory Signatures Driving Recurrence in Adjuvant-Treated NSCLC
Source: Research Square preprint supplement (doi:10.21203/rs.3.rs-7692105/v1), 2025-10-23
Supplement: Supplementary file 2 [file ec7b97359d379f41ae2783a9.xlsx]

## Sheet: Supplementary_table1
Supplemntary table 1: Kaplan Meier results for robust features.
				Training				Validation
Histology	Metric	Cell type granularity	Feature	p-value training	Logrank Test Statistic train	n -high	n - low	p-value validation	Logrank Test Statistic validation	n -high	n - low
LUAD & LUSC	Proportion: Stroma neighbourhood	Base cell types + metabolic	Glycolytic:Stroma	0.039419	4.24272	26	26	0.0271008	4.88438	25	26
LUAD & LUSC	Proportion: Stroma neighbourhood	Metabolic only	Glycolytic Lipid Oxidation PPP:Stroma	0.0216192	5.27617	26	26	0.0444027	4.04118	25	26
LUAD & LUSC	Proportion: Tumour/Stroma Interface neighbourhood	Metabolic only	Glycolytic Glutamine import:Tumour Stroma interface	0.00564304	7.6609	26	26	0.0261646	4.94511	25	26
LUAD & LUSC	Proportion: Stroma neighbourhood	Metabolic only	Lipid Oxidation PPP Glutamine import:Stroma	0.000476697	12.2047	26	26	0.00250467	9.13718	25	26
LUAD & LUSC	Proportion: Stroma neighbourhood	Base cell types + metabolic	CD4 cellsLipid Oxidation PPP:Stroma	0.00420352	8.19374	26	26	0.00861815	6.9003	25	26
LUAD & LUSC	Proportion: Stroma neighbourhood	Base cell types + metabolic	Other Stromal cellsLipid Oxidation PPP Glutamine import:Stroma	0.021944	5.25022	26	26	0.00702061	7.26769	25	26
LUAD & LUSC	Proportion: Tumour neighbourhood	Base cell types + metabolic	FibroblastPPP Glutamine import:Tumour	0.0217959	5.26201	26	26	0.0147181	5.94991	25	26
LUAD & LUSC	Proportion: Tumour/Stroma Interface neighbourhood	Structural/immune/tumour + functional	ImmuneCell PD1 GRZMB:Tumour Stroma interface	0.0307193	4.66858	26	26	0.0341204	4.48866	25	26
LUAD & LUSC	Proportion: Tumour neighbourhood (k2)	Metabolic only	Glycolytic Glutamine import:Tumour duplicated 0	0.00792029	7.05141	26	26	0.0345428	4.46764	25	26
LUAD & LUSC	Proportion: Stroma neighbourhood (k2)	Metabolic only	Lipid Oxidation PPP Glutamine import:Stroma duplicated 0	0.00219169	9.38164	26	26	0.0169095	5.70574	25	26
LUAD & LUSC	Proportion: Stroma neighbourhood (k2)	Base cell types + metabolic	CD4 cellsLipid Oxidation PPP:Stroma duplicated 0	0.00493077	7.90465	26	26	0.00861815	6.9003	25	26
LUAD & LUSC	Proportion: Stroma neighbourhood (k2)	Base cell types + metabolic	CD8 cellsPPP:Stroma duplicated 0	0.0148316	5.93637	26	26	0.0206958	5.35223	25	26
LUAD & LUSC	Proportion: Stroma neighbourhood (k2)	Base cell types + metabolic	Other Stromal cellsLipid Oxidation PPP Glutamine import:Stroma duplicated 0	0.021944	5.25022	26	26	0.00702061	7.26769	25	26
LUAD & LUSC	Proportion: Stroma neighbourhood (k2)	Base cell types + metabolic	CD8 cellsLipid Oxidation PPP Glutamine import:Stroma duplicated 0	0.000686337	11.5259	26	26	0.0122029	6.28115	25	26
LUAD & LUSC	Proportion: Stroma neighbourhood (k2)	Structural/immune/tumour + functional	ImmuneCell PD1 HLADR:Stroma duplicated 0	0.0228295	5.18143	26	26	0.02556	4.98554	25	26
LUAD & LUSC	G-cross AUC	Metabolic tumour + base cell type	Tumour metalow to Glycolytic	0.0301038	4.70335	17	17	0.0207977	5.34367	16	17
LUAD & LUSC	G-cross AUC	Metabolic only	Glycolytic PPP Glutamine import to Glutamine import	0.0126267	6.22067	25	25	0.040582	4.19338	23	24
LUAD & LUSC	G-cross AUC	Metabolic only	Lipid Oxidation PPP Glutamine import to Glutamine import	0.00240348	9.21266	22	23	0.00821532	6.98593	22	23
LUAD & LUSC	G-cross AUC	Metabolic only	Lipid Oxidation PPP Glutamine import to Glycolytic Glutamine import	0.000294697	13.1038	19	20	0.0122198	6.2787	19	19
LUAD & LUSC	G-cross AUC	Base cell types + metabolic	B cellsPhenotype to CD8 cellsPPP Glutamine import	0.0109873	6.46737	15	16	0.0280588	4.82445	15	16
LUAD & LUSC	G-cross AUC	Base cell types + metabolic	CD4 cellsPPP Glutamine import to CD4 cellsPPP Glutamine import	0.0286844	4.78645	19	19	0.0106498	6.52284	18	19
LUAD & LUSC	G-cross AUC	Base cell types + metabolic	CD4 cellsPhenotype to FibroblastPhenotype	0.0446781	4.03075	25	26	0.0343248	4.47845	24	25
LUAD & LUSC	G-cross AUC	Base cell types + metabolic	CD8 cellsGlycolytic PPP Glutamine import to FibroblastGlutamine import	0.0458063	3.9887	17	17	0.00208616	9.47214	19	19
LUAD & LUSC	G-cross AUC	Base cell types + metabolic	CD8 cellsGlycolytic PPP Glutamine import to FibroblastPhenotype	0.0426962	4.10739	21	22	0.00276012	8.95962	22	22
LUAD & LUSC	G-cross AUC	Base cell types + metabolic	FibroblastGlycolytic PPP Glutamine import to FibroblastGlutamine import	0.00365935	8.44556	18	19	0.00919311	6.78492	17	17
LUAD & LUSC	G-cross AUC	Base cell types + metabolic	FibroblastPPP Glutamine import to FibroblastGlutamine import	0.00990473	6.65195	21	22	0.00589319	7.58268	20	20
LUAD & LUSC	G-cross AUC	Base cell types + metabolic	MacrophagesLipid Oxidation PPP to FibroblastGlutamine import	0.00560744	7.67232	19	19	2.96184e-05	17.4422	20	20
LUAD & LUSC	G-cross AUC	Base cell types + metabolic	MacrophagesLipid Oxidation PPP to Other Stromal cellsGlycolytic PPP	0.0278146	4.83952	17	18	0.0471085	3.94151	17	17
LUAD & LUSC	G-cross AUC	Base cell types + metabolic	MacrophagesPPP Glutamine import to CD4 cellsPPP Glutamine import	0.0157202	5.83391	19	20	0.0307466	4.66706	19	19
LUAD & LUSC	G-cross AUC	Base cell types + metabolic	MacrophagesPhenotype to FibroblastGlutamine import	0.0441306	4.05156	22	22	0.0194589	5.4598	21	21
LUAD & LUSC	G-cross AUC	Base cell types + metabolic	Other Stromal cellsLipid Oxidation to FibroblastGlutamine import	0.0390233	4.25985	21	22	0.00755635	7.13572	21	22
LUAD & LUSC	G-cross AUC	Base cell types + metabolic	Other Stromal cellsLipid Oxidation PPP Glutamine import to Other Stromal cellsGlutamine import	0.00452647	8.05954	13	13	0.0306874	4.67037	18	18
LUAD & LUSC	G-cross AUC	Base cell types + metabolic	Tumour (metabolically low) to Tumour Glycolytic	0.0301038	4.70335	17	17	0.0207977	5.34367	16	17
LUAD & LUSC	G-cross AUC	Base cell types + metabolic	Vessels Lipid Oxidation PPP to Fibroblast Glutamine import	0.000361721	12.7202	15	16	0.00415622	8.21427	17	17
LUAD & LUSC	Proportion: whole core	Base cell types + metabolic	CD4 cellsGlycolytic Glutamine import	0.00281979	8.92055	26	26	0.0203855	5.37858	25	26
LUAD & LUSC	Proportion: whole core	Base cell types + metabolic	CD4 cellsLipid Oxidation PPP	0.000805836	11.2277	26	26	0.013435	6.11091	25	26
LUAD & LUSC	Proportion: whole core	Base cell types + metabolic	CD4 cellsLipid Oxidation PPP Glutamine import	0.0213827	5.29533	26	26	0.00235141	9.25276	25	26
LUAD & LUSC	Proportion: whole core	Base cell types + metabolic	CD8 cellsGlycolytic Glutamine import	0.00603054	7.54116	26	26	0.0456219	3.9955	25	26
LUAD & LUSC	Proportion: whole core	Base cell types + metabolic	CD8 cellsLipid Oxidation PPP Glutamine import	0.0172952	5.66617	26	26	0.0193903	5.46597	25	26
LUAD & LUSC	Proportion: whole core	Base cell types + metabolic	FibroblastGlutamine import	0.0211414	5.3151	26	26	0.0111589	6.43984	25	26
LUAD & LUSC	Proportion: whole core	Base cell types + metabolic	FibroblastLipid Oxidation PPP Glutamine import	0.021944	5.25022	26	26	0.0456487	3.99451	25	26
LUAD & LUSC	Proportion: whole core	Metabolic only	Lipid Oxidation PPP Glutamine import	0.00899087	6.82464	26	26	0.0169095	5.70574	25	26
LUSC	JSD: 2 neighbourhoods - Stroma	Metabolic tumour + base cell type	k2CNs1 Macrophages M2 PDL1+ Cytotoxic CD8 cells	0.0100633	6.62366	3	4	0.0246023	5.05166	3	4
LUSC	JSD: 3 neighbourhoods - Stroma	Metabolic tumour + base cell type	k3CNs2 Macrophages M2 PDL1+ Cytotoxic CD8 cells	0.0100633	6.62366	3	4	0.0246023	5.05166	3	4
LUSC	Proportion: Stroma neighbourhood (k3)	Metabolic only	Glycolytic Glutamine import:Stroma	0.00251716	9.12808	6	6	0.00265606	9.02985	5	5
LUSC	Proportion: Stroma neighbourhood (k3)	Base cell types + metabolic	VesselsGlutamine import:Stroma	0.0338152	4.50402	6	6	0.0262239	4.9412	5	5
LUSC	Proportion: Tumour Stroma interface (k3)	Base cell types + metabolic	Other Stromal cellsGlycolytic Glutamine import:Tumour Stroma interface	0.0085268	6.91935	6	6	0.00265606	9.02985	5	5
LUSC	Proportion: Stroma neighbourhood (k3)	Base cell types + metabolic	Other Stromal cellsGlutamine import:Stroma	0.0085268	6.91935	6	6	0.00265606	9.02985	5	5
LUSC	Proportion: Stroma neighbourhood (k3)	Base cell types + metabolic	MacrophagesGlutamine import:Stroma	0.00136128	10.2575	6	6	0.00265606	9.02985	5	5
LUSC	Proportion: Stroma neighbourhood (k3)	Base cell types + metabolic	VesselsGlycolytic Glutamine import:Stroma	0.00251716	9.12808	6	6	0.00265606	9.02985	5	5
LUSC	Proportion: Tumour Stroma interface (k3)	Structural/immune/tumour + functional	ImmuneCell PD1:Tumour Stroma interface	0.0338152	4.50402	6	6	0.00265606	9.02985	5	5
LUSC	Proportion: Tumour Stroma interface (k3)	Structural/immune/tumour + functional	StructuralCell PD1:Tumour Stroma interface	0.00136128	10.2575	6	6	0.0262239	4.9412	5	5
LUSC	Proportion: Stroma neighbourhood (k2)	Metabolic only	Glycolytic Glutamine import:Stroma duplicated 0	0.00251716	9.12808	6	6	0.00265606	9.02985	5	5
LUSC	Proportion: Stroma neighbourhood (k2)	Base cell types + metabolic	Other Stromal cellsGlutamine import:Stroma duplicated 0	0.0085268	6.91935	6	6	0.00265606	9.02985	5	5
LUSC	Proportion: Stroma neighbourhood (k2)	Base cell types + metabolic	FibroblastGlycolytic Glutamine import:Stroma duplicated 0	0.0085268	6.91935	6	6	0.00265606	9.02985	5	5
LUSC	Proportion: Stroma neighbourhood (k2)	Base cell types + metabolic	MacrophagesGlutamine import:Stroma duplicated 0	0.00136128	10.2575	6	6	0.0262239	4.9412	5	5
LUSC	Proportion: Stroma neighbourhood (k2)	Base cell types + metabolic	VesselsGlycolytic Glutamine import:Stroma duplicated 0	0.00251716	9.12808	6	6	0.00265606	9.02985	5	5
LUSC	Proportion: Stroma neighbourhood (k2)	Structural/immune/tumour + functional	structural immune tumour functionalStructuralCell PDL1:Stroma duplicated 0	0.0085268	6.91935	6	6	0.00265606	9.02985	5	5
LUSC	G-cross AUC	Functional cell types	Proliferating tumour to MHC I tumour	0.0176767	5.62791	3	4	0.0389475	4.26316	3	3
LUSC	G-cross AUC	Base cell types + metabolic tumour	PPP to Glutamine import	0.018594	5.53931	5	6	0.0262239	4.9412	5	5
LUSC	G-cross AUC	Base cell types + metabolic tumour	PPP Glutamine import to Glutamine import	0.018594	5.53931	5	6	0.0262239	4.9412	5	5
LUSC	G-cross AUC	Metabolic only	Glycolytic PPP Glutamine import to Glycolytic Glutamine import	0.00265606	9.02985	5	5	0.00265606	9.02985	5	5
LUSC	G-cross AUC	Metabolic only	Lipid Oxidation Glutamine import to Glutamine import	0.018594	5.53931	5	6	0.0262239	4.9412	5	5
LUSC	G-cross AUC	Metabolic only	Lipid Oxidation PPP Glutamine import to Glycolytic Glutamine import	0.0401237	4.21265	4	5	0.00265606	9.02985	5	5
LUSC	G-cross AUC	Base cell types + metabolic	CD4 cellsGlutamine import to TumourGlutamine import	0.0196444	5.44322	6	6	0.0401237	4.21265	4	5
LUSC	G-cross AUC	Base cell types + metabolic	CD4 cellsGlycolytic Glutamine import to Other Stromal cellsGlycolytic PPP Glutamine import	0.0401237	4.21265	4	4	0.00672717	7.34441	4	5
LUSC	G-cross AUC	Base cell types + metabolic	CD4 cellsGlycolytic PPP to MacrophagesPhenotype	0.0100633	6.62366	3	4	0.0246023	5.05166	3	4
LUSC	G-cross AUC	Base cell types + metabolic	CD4 cellsGlycolytic PPP Glutamine import to FibroblastGlutamine import	0.0401237	4.21265	4	5	0.0100633	6.62366	4	4
LUSC	G-cross AUC	Base cell types + metabolic	CD4 cellsLipid Oxidation PPP to TumourGlutamine import	0.0246023	5.05166	3	3	0.0493544	3.86326	3	4
LUSC	G-cross AUC	Base cell types + metabolic	CD4 cellsOxidative Stress to TumourGlutamine import	0.0481732	3.90393	4	5	0.0389475	4.26316	3	3
LUSC	G-cross AUC	Base cell types + metabolic	CD4 cellsPPP to Other Stromal cellsGlutamine import	0.0475767	3.92488	4	4	0.0475767	3.92488	4	4
LUSC	G-cross AUC	Base cell types + metabolic	CD4 cellsPhenotype to VesselsPPP	0.0269218	4.89582	5	5	0.0389475	4.26316	3	3
LUSC	G-cross AUC	Base cell types + metabolic	CD8 cellsLipid Oxidation to FibroblastGlutamine import	0.0136169	6.08714	4	5	0.0100633	6.62366	4	4
LUSC	G-cross AUC	Base cell types + metabolic	CD8 cellsLipid Oxidation to Other Stromal cellsGlutamine import	0.0222818	5.22364	5	5	0.00672717	7.34441	4	5
LUSC	G-cross AUC	Base cell types + metabolic	CD8 cellsLipid Oxidation to TumourGlutamine import	0.00377697	8.38804	5	6	0.00672717	7.34441	4	5
LUSC	G-cross AUC	Base cell types + metabolic	CD8 cellsPPP to MacrophagesPPP Glutamine import	0.00490551	7.91395	5	5	0.0100633	6.62366	4	4
LUSC	G-cross AUC	Base cell types + metabolic	CD8 cellsPPP to Other Stromal cellsGlutamine import	0.0222818	5.22364	5	5	0.00672717	7.34441	4	5
LUSC	G-cross AUC	Base cell types + metabolic	CD8 cellsPPP to TumourGlutamine import	0.00377697	8.38804	5	6	0.00672717	7.34441	4	5
LUSC	G-cross AUC	Base cell types + metabolic	CD8 cellsPPP Glutamine import to Other Stromal cellsPPP	0.00641657	7.42943	5	5	0.0262239	4.9412	5	5
LUSC	G-cross AUC	Base cell types + metabolic	CD8 cellsPhenotype to FibroblastGlutamine import	0.018594	5.53931	5	6	0.0401237	4.21265	4	5
LUSC	G-cross AUC	Base cell types + metabolic	CD8 cellsPhenotype to MacrophagesGlutamine import	0.0262239	4.9412	5	5	0.0401237	4.21265	4	5
LUSC	G-cross AUC	Base cell types + metabolic	FibroblastLipid Oxidation PPP to TumourGlutamine import	0.0265844	4.9176	4	4	0.0475767	3.92488	4	4
LUSC	G-cross AUC	Base cell types + metabolic	MacrophagesGlycolytic to TumourPPP	0.0401237	4.21265	4	4	0.0475767	3.92488	4	4
LUSC	G-cross AUC	Base cell types + metabolic	MacrophagesLipid Oxidation Glutamine import to Other Stromal cellsGlutamine import	0.0389475	4.26316	3	3	0.00672717	7.34441	4	5
LUSC	G-cross AUC	Base cell types + metabolic	MacrophagesLipid Oxidation PPP to CD8 cellsPhenotype	0.0353269	4.42931	5	5	0.0100633	6.62366	4	4
LUSC	G-cross AUC	Base cell types + metabolic	MacrophagesLipid Oxidation PPP to TumourGlutamine import	0.0196697	5.44097	5	6	0.00672717	7.34441	4	5
LUSC	G-cross AUC	Base cell types + metabolic	MacrophagesLipid Oxidation PPP to TumourPPP	0.0126705	6.21454	5	6	0.0475767	3.92488	4	4
LUSC	G-cross AUC	Base cell types + metabolic	MacrophagesOxidative Stress to TumourGlutamine import	0.0493544	3.86326	3	4	0.0100633	6.62366	4	4
LUSC	G-cross AUC	Base cell types + metabolic	MacrophagesPhenotype to MacrophagesLipid Oxidation Glutamine import	0.0389475	4.26316	3	3	0.00672717	7.34441	4	5
LUSC	G-cross AUC	Base cell types + metabolic	Other Stromal cellsGlycolytic Glutamine import to CD4 cellsLipid Oxidation	0.0475767	3.92488	3	4	0.0401237	4.21265	4	4
LUSC	G-cross AUC	Base cell types + metabolic	Other Stromal cellsGlycolytic PPP Glutamine import to CD4 cellsPPP	0.0108246	6.49389	4	5	0.0475767	3.92488	4	4
LUSC	G-cross AUC	Base cell types + metabolic	Other Stromal cellsLipid Oxidation to CD8 cellsGlycolytic PPP Glutamine import	0.0222818	5.22364	5	5	0.0389475	4.26316	3	3
LUSC	G-cross AUC	Base cell types + metabolic	Other Stromal cellsLipid Oxidation to CD8 cellsLipid Oxidation	0.0353269	4.42931	5	5	0.00424525	8.17582	4	5
LUSC	G-cross AUC	Base cell types + metabolic	Other Stromal cellsLipid Oxidation to TumourGlutamine import	0.00136128	10.2575	6	6	0.00265606	9.02985	5	5
LUSC	G-cross AUC	Base cell types + metabolic	Other Stromal cellsLipid Oxidation PPP to TumourGlutamine import	0.0196697	5.44097	5	5	0.00672717	7.34441	4	5
LUSC	G-cross AUC	Base cell types + metabolic	Other Stromal cellsLipid Oxidation PPP to TumourPPP	0.0318022	4.60913	4	5	0.0475767	3.92488	4	4
LUSC	G-cross AUC	Base cell types + metabolic	Other Stromal cellsOxidative Stress to CD8 cellsLipid Oxidation	0.0100633	6.62366	3	4	0.0176767	5.62791	3	4
LUSC	G-cross AUC	Base cell types + metabolic	TumourLipid Oxidation to MacrophagesOxidative Stress	0.0475767	3.92488	4	4	0.0246023	5.05166	3	4
LUSC	G-cross AUC	Base cell types + metabolic	TumourLipid Oxidation PPP to FibroblastGlutamine import	0.0176689	5.62869	3	4	0.0389475	4.26316	3	3
LUSC	G-cross AUC	Base cell types + metabolic	TumourPPP to TumourGlutamine import	0.018594	5.53931	5	6	0.0262239	4.9412	5	5
LUSC	G-cross AUC	Base cell types + metabolic	TumourPPP Glutamine import to FibroblastGlutamine import	0.0262239	4.9412	5	5	0.0401237	4.21265	4	5
LUSC	G-cross AUC	Base cell types + metabolic	TumourPPP Glutamine import to TumourGlutamine import	0.018594	5.53931	5	6	0.0262239	4.9412	5	5
LUSC	G-cross AUC	Base cell types + metabolic	TumourPhenotype to VesselsPPP	0.0269218	4.89582	5	5	0.0389475	4.26316	3	3
LUSC	G-cross AUC	Base cell types + metabolic	VesselsPhenotype to MacrophagesGlutamine import	0.0262239	4.9412	5	5	0.0401237	4.21265	4	5
LUSC	Proportion: whole core	Base cell types + metabolic	CD4 cellsGlycolytic Glutamine import	0.0085268	6.91935	6	6	0.00265606	9.02985	5	5
LUSC	Proportion: whole core	Base cell types + metabolic	FibroblastGlycolytic Glutamine import	0.0085268	6.91935	6	6	0.00265606	9.02985	5	5
LUSC	Proportion: whole core	Base cell types + metabolic	Other Stromal cellsGlycolytic Glutamine import	0.0085268	6.91935	6	6	0.00265606	9.02985	5	5
LUSC	Proportion: whole core	Base cell types + metabolic	Other Stromal cellsLipid Oxidation PPP	0.00136128	10.2575	6	6	0.0262239	4.9412	5	5
LUAD	JSD: Whole core	Base cell types	Macrophages PDL1+ & CD4 TFH	0.00843988	6.93767	13	14	0.0272979	4.87187	13	13
LUAD	Proportion: Tumour Stroma interface (k3)	Base cell types	Tumour:Tumour Stroma interface	0.0277852	4.84135	18	19	0.0255889	4.98359	19	20
LUAD	Proportion: Tumour (k3)	Metabolic only	Lipid Oxidation PPP Glutamine import:Tumour	0.0341555	4.4869	18	19	0.0227419	5.18811	19	20
LUAD	Proportion: Stroma neighbourhood (k2)	Base cell types + metabolic	CD8 cellsPPP:Stroma duplicated 0	0.0276921	4.84713	18	19	0.0318738	4.60527	19	20
LUAD	G-cross AUC	Base cell types + metabolic	CD4 cellsPPP Glutamine import to FibroblastPhenotype	0.0181128	5.58521	14	15	0.0249016	5.03072	16	17
LUAD	G-cross AUC	Base cell types + metabolic	MacrophagesLipid Oxidation PPP to FibroblastGlutamine import	0.00679563	7.32621	13	13	0.0122734	6.27093	15	15
LUAD	G-cross AUC	Base cell types + metabolic	MacrophagesPPP Glutamine import to CD4 cellsPPP Glutamine import	0.0175125	5.64427	14	14	0.0221122	5.23693	14	14
LUAD	G-cross AUC	Base cell types + metabolic	Other Stromal cellsPPP Glutamine import to FibroblastPhenotype	0.0164174	5.75761	17	17	0.0434109	4.07933	17	17
LUAD	G-cross AUC	Base cell types + metabolic	VesselsLipid Oxidation PPP to FibroblastGlutamine import	0.0145028	5.97588	10	10	0.00933623	6.75735	13	13
LUAD	Proportion: whole core	Base cell types + metabolic	CD4 cellsLipid Oxidation PPP Glutamine import	0.0487082	3.88538	18	19	0.0132325	6.13776	19	20

## Sheet: Supplementary_table2
Supplemntary table 2: Mann-Whitney results for robust features.
				Training							Validation
Histology	Feature type	Cell type granularity	Feature	p-value	Z-score	Mean Group 1	Mean Group 2	Std Group 1	Std Group 2	U_stat	p-value	Z-score	Mean Group 1	Mean Group 2	Std Group 1	Std Group 2	U_stat
LUAD & LUSC	Proportion: Stroma neighbourhood (kn3)	Metabolism only	Glycolytic Lipid Oxidation PPP	0.005652	2.73603	0.0102684	0.002475	0.016889	0.00671	487.5	0.009046	-2.58653	0.001355	0.008046	0.00236	0.012748	183
LUAD & LUSC	Proportion: Tumour neighbourhood (kn3)	Metabolism only	Lipid Oxidation PPP Glutamine import	0.041809	1.97653	0.0110623	0.004208	0.019429	0.015	446	0.046274	-1.92088	0.003439	0.010822	0.008332	0.0174	218
LUAD & LUSC	Proportion: Stroma neighbourhood (kn3)	Base cell type + metabolism	Fibroblast	0.008634	-2.63537	0.0306894	0.054136	0.041423	0.046823	194	0.008202	2.65309	0.037436	0.01918	0.038452	0.021308	458.5
LUAD & LUSC	Proportion: Stroma neighbourhood (kn3)	Base cell type + metabolism	CD4 cellsLipid Oxidation PPP	0.00022	3.69684	0.0092611	0.001353	0.013154	0.002436	540	0.01527	-2.41536	0.002096	0.005782	0.002896	0.006894	192
LUAD & LUSC	Proportion: Stroma neighbourhood (kn3)	Base cell type + metabolism	Other Stromal cellsLipid Oxidation PPP Glutamine import	0.002229	2.96479	0.0121225	0.001854	0.019661	0.005065	500	0.008077	-2.62457	0.003289	0.014349	0.008052	0.019471	181
LUAD & LUSC	Proportion: Stroma neighbourhood (kn3)	Broad (Structural/immune/tumour) + functional	ImmuneCell PD1+	0.00618	2.74518	0.0495618	0.006575	0.070949	0.010538	488	0.048917	-1.97793	0.011098	0.032809	0.020034	0.046416	215
LUAD & LUSC	Proportion: Tumour-Stroma interface neighbourhood (kn3)	Broad (Structural/immune/tumour) + functional	ImmuneCell PD1+	0.01048	2.56217	0.0179457	0.003334	0.021772	0.005917	478	0.009373	-2.60555	0.005184	0.015535	0.010066	0.021969	182
LUAD & LUSC	Proportion: Stroma neighbourhood (kn3)	Broad (Structural/immune/tumour) + functional	StructuralCell PD1 ICOS+	0.017297	2.36085	0.00443589	0.000982	0.005978	0.001678	467	0.020337	-2.23469	0.001062	0.003704	0.003477	0.008101	201.5
LUAD & LUSC	Proportion: Stroma neighbourhood (kn2)	Metabolism only	Glycolytic Lipid Oxidation PPP	0.00231	3.0197	0.00954908	0.002138	0.015461	0.005525	503	0.008853	-2.60555	0.001324	0.007374	0.002147	0.01132	182
LUAD & LUSC	Proportion: Stroma neighbourhood (kn2)	Base cell type + metabolism	Fibroblast	0.014557	-2.45236	0.0288833	0.050245	0.035732	0.043018	204	0.006534	2.72917	0.036704	0.018625	0.03814	0.020304	462.5
LUAD & LUSC	Proportion: Stroma neighbourhood (kn2)	Base cell type + metabolism	CD4 cellsLipid Oxidation PPP	0.000293	3.62364	0.00804546	0.001311	0.011367	0.00243	536	0.023687	-2.26321	0.001967	0.00512	0.002592	0.006299	200
LUAD & LUSC	Proportion: Stroma neighbourhood (kn2)	Base cell type + metabolism	Other Stromal cellsLipid Oxidation PPP Glutamine import	0.002414	2.95564	0.010593	0.001724	0.016394	0.004325	499.5	0.019548	-2.32027	0.003237	0.012436	0.007701	0.01659	197
LUAD & LUSC	Proportion: Tumour neighbourhood (kn2)	Base cell type + metabolism	CD4 cellsPPP Glutamine import	0.011317	2.48896	0.0025099	0.000654	0.003432	0.001016	474	0.032483	-2.09205	0.000969	0.003997	0.001688	0.007696	209
LUAD & LUSC	Proportion: Stroma neighbourhood (kn3)	Base cell type + metabolism	FibroblastGlutamine import	0.002848	-2.99224	0.00486458	0.014134	0.006844	0.014207	174.5	0.027975	2.20616	0.010742	0.006242	0.009971	0.009474	435
LUAD & LUSC	Proportion: Stroma neighbourhood (kn3)	Broad (Structural/immune/tumour) + functional	ImmuneCell PD1	0.019575	2.34255	0.0430136	0.005796	0.061508	0.008699	466	0.019807	-2.33929	0.010276	0.030642	0.018874	0.042662	196
LUAD & LUSC	Proportion: Tumour neighbourhood (kn2)	Broad (Structural/immune/tumour) + functional	ImmuneCell PD1	0.006161	2.72688	0.00798259	0.002097	0.010017	0.004903	487	0.037061	-2.07303	0.00274	0.006911	0.005877	0.009879	210
LUAD & LUSC	Proportion: Stroma neighbourhood (kn3)	Broad (Structural/immune/tumour) + functional	ImmuneCell PDL1+ GRZMB+	0.041434	-1.95823	0.00122716	0.002596	0.00252	0.003908	231	0.041322	1.98744	0.002441	0.0008	0.004531	0.001513	423.5
LUAD & LUSC	Proportion: Stroma neighbourhood (kn3)	Broad (Structural/immune/tumour) + functional	StructuralCell PD1+ ICOS+	0.016447	2.37915	0.00408632	0.000848	0.005622	0.001438	468	0.005721	-2.70064	0.001018	0.003647	0.003248	0.007508	177
LUAD & LUSC	G-cross AUC	Functional	Cytotoxic CD8 cells to Tumour	0.02624	2.23917	459.831	397.615	29.4924	102.863	213.5	0.011365	-2.54686	388.223	462.488	98.9712	26.8919	80
LUAD & LUSC	G-cross AUC	Base cell type + metabolic tumour	Glycolytic to Macrophages M2	0.017941	2.38333	428.434	387.497	35.5355	52.5247	221.5	0.009681	-2.60473	388.894	439.335	76.1871	37.9385	63
LUAD & LUSC	Proportion: whole core	Base cell type + metabolism	Fibroblast Glutamine import	0.008403	-2.64452	0.00340136	0.009167	0.004493	0.011011	193.5	0.025425	2.24419	0.007906	0.004177	0.007051	0.006389	437
LUAD & LUSC	Proportion: whole core	Base cell type + metabolism	Other Stromal cells Glutamine import	0.047064	-1.99483	0.00576682	0.012907	0.007503	0.016958	229	0.029419	2.18714	0.01027	0.006663	0.011299	0.011148	434
LUAD & LUSC	Proportion: whole core	Base cell type + metabolism	Glycolytic Lipid Oxidation PPP	0.007795	2.65367	0.00592525	0.001091	0.01097	0.002578	483	0.020214	-2.32027	0.001122	0.004423	0.002087	0.007263	197
LUAD	G-cross AUC	Base cell type + metabolism	CD8 cells Lipid Oxidation PPP to TumourLipid Oxidation	0.037004	-2.11468	392.824	437.283	59.0855	40.1428	35	0.049378	-1.98957	361.805	428.556	110.619	48.5598	50
LUAD	G-cross AUC	Base cell type + metabolism	Fibroblast Glycolytic PPP to FibroblastLipid Oxidation	0.042583	-2.05675	337.553	397.783	82.7198	78.9	36	0.048856	-1.99881	285.159	402.863	154.1	77.4685	37
LUAD	Proportion: whole core	Base cell type + metabolism	CD4 cells Lipid Oxidation PPP Glutamine import	0.033729	2.05111	0.00181921	0.00076	0.002659	0.001774	238.5	0.042093	-1.9259	0.001912	0.001008	0.005285	0.001023	119
LUSC	Proportion: Tumour-Stroma interface neighbourhood (kn3)	Metabolism only	Glycolytic	0.015152	-2.40192	0.00424556	0.036852	0.007507	0.037334	3	0.042197	-2.13201	0.002035	0.037577	0.003629	0.038868	2
LUSC	Proportion: Stroma neighbourhood (kn3)	Metabolism only	Glycolytic Glutamine import	0.012907	-2.56205	0.00169754	0.074679	0.002291	0.053898	2	0.038095	-2.13201	0.001687	0.065157	0.001689	0.101536	2
LUSC	Proportion: Stroma neighbourhood (kn3)	Metabolism only	Glutamine import	0.008658	-2.56205	0.0204869	0.162914	0.027097	0.108215	2	0.009524	-2.55841	0.010628	0.094926	0.006824	0.027356	0
LUSC	Proportion: Stroma neighbourhood (kn3)	Metabolism only	Lipid Oxidation PPP	0.015152	2.40192	0.05854	0.007484	0.056959	0.008791	33	0.019048	2.34521	0.088768	0.011062	0.077012	0.011666	23
LUSC	Proportion: Stroma neighbourhood (kn3)	Metabolism only	Lipid Oxidation PPP Glutamine import	0.041126	2.08167	0.0337549	0.001986	0.048936	0.00382	31	0.038095	2.13201	0.079483	0.007133	0.072799	0.00933	22
LUSC	Proportion: Stroma neighbourhood (kn3)	Base cell type + metabolism	Other Stromal cellsLipid Oxidation PPP	0.007796	2.72218	0.011842	0.000959	0.013067	0.001571	35	0.013922	2.55841	0.017512	0.000756	0.009222	0.000833	24
LUSC	Proportion: Stroma neighbourhood (kn3)	Base cell type + metabolism	Vessels Lipid Oxidation PPP	0.019373	2.40192	0.0059088	0.00042	0.005181	0.000702	33	0.013922	2.55841	0.003027	0.000377	0.001909	0.000348	24
LUSC	Proportion: Stroma neighbourhood (kn3)	Base cell type + metabolism	Fibroblast Lipid Oxidation PPP Glutamine import	0.010065	2.56205	0.00840124	9.57e-05	0.014406	0.000234	34	0.024741	2.34521	0.025083	0.001429	0.031215	0.002418	23
LUSC	Proportion: Tumour-Stroma interface neighbourhood (kn3)	Base cell type + metabolism	Other Stromal cells Glycolytic Glutamine import	0.024992	-2.24179	0.000299815	0.016422	0.000627	0.019291	4	0.024741	-2.34521	0.000487	0.014041	0.000563	0.019101	1
LUSC	Proportion: Stroma neighbourhood (kn3)	Base cell type + metabolism	CD4 cells Lipid Oxidation PPP	0.043826	2.08167	0.00923354	0.000345	0.010299	0.000461	31	0.013062	2.55841	0.013262	0.000429	0.010086	0.000502	24
LUSC	Proportion: Stroma neighbourhood (kn3)	Base cell type + metabolism	Fibroblast Lipid Oxidation PPP	0.034087	2.16173	0.0158546	0.000849	0.027043	0.001157	31.5	0.013922	2.55841	0.020597	0.001113	0.021527	0.001354	24
LUSC	Proportion: Stroma neighbourhood (kn3)	Base cell type + metabolism	Macrophages Glycolytic Glutamine import	0.004337	-2.88231	0.000193248	0.010126	0.000343	0.009939	0	0.040324	-2.13201	0.000171	0.009438	0.000342	0.017013	2
LUSC	Proportion: Stroma neighbourhood (kn3)	Base cell type + metabolism	Other Stromal cellsGlutamine import	0.015152	-2.40192	0.00486378	0.027949	0.008005	0.030868	3	0.009524	-2.55841	0.002687	0.021175	0.00249	0.010475	0
LUSC	Proportion: Stroma neighbourhood (kn3)	Base cell type + metabolism	Other Stromal cells Lipid Oxidation PPP Glutamine import	0.027768	2.24179	0.0122153	0.000194	0.018592	0.000301	32	0.019048	2.34521	0.026424	0.001234	0.024825	0.001604	23
LUSC	Proportion: Stroma neighbourhood (kn3)	Base cell type + metabolism	Macrophages Glutamine import	0.004998	-2.88231	0.00196127	0.025238	0.003147	0.022504	0	0.009524	-2.55841	0.001423	0.012405	0.001093	0.006623	0
LUSC	Proportion: Stroma neighbourhood (kn3)	Base cell type + metabolism	Vessels Glycolytic Glutamine import	0.019373	-2.40192	0.000583999	0.004782	0.001237	0.004298	3	0.011417	-2.55841	0	0.001879	0	0.001588	0
LUSC	Proportion: Stroma neighbourhood (kn3)	Base cell type + metabolism	Fibroblast Glutamine import	0.008127	-2.72218	0.00169857	0.021468	0.003099	0.013272	1	0.009524	-2.55841	0.001908	0.018235	0.001682	0.010881	0
LUSC	Proportion: Stroma neighbourhood (kn3)	Broad (Structural/immune/tumour) + functional	Structural Cell PD1 HLADR ICOS GRZMB	0.037941	2.08167	0.000856297	0.000331	0.000916	0.000811	31	0.036643	2.13201	0.004987	0.0004	0.00674	0.000894	22
LUSC	Proportion: Tumour-Stroma interface neighbourhood (kn3)	Broad (Structural/immune/tumour) + functional	Immune Cell PD1 Stroma interface	0.012907	2.56205	0.032573	0.000806	0.025362	0.000938	34	0.042197	2.13201	0.027591	0.003238	0.037055	0.004196	22
LUSC	Proportion: Stroma neighbourhood (kn3)	Broad (Structural/immune/tumour) + functional	Structural Cell PD1	0.027768	2.24179	0.07919	0.000706	0.078968	0.001322	32	0.038095	2.13201	0.083209	0.002787	0.086144	0.003876	22
LUSC	Proportion: Tumour-Stroma interface neighbourhood (kn3)	Broad (Structural/immune/tumour) + functional	Structural Cell PD1 Stroma interface	0.003665	2.88231	0.0466728	0.000111	0.056188	0.000273	36	0.013062	2.55841	0.040022	0.000818	0.044911	0.001232	24
LUSC	Proportion: Stroma neighbourhood (kn3)	Broad (Structural/immune/tumour) + functional	Structural Cell PD1 ICOS	0.006151	2.72218	0.00870524	5.52e-05	0.008402	0.000135	35	0.024741	2.34521	0.007026	0.000425	0.00628	0.000447	23
LUSC	Proportion: Stroma neighbourhood (kn3)	Broad (Structural/immune/tumour) + functional	Immune Cell PD1 ICOS	0.004998	2.88231	0.0155139	0.000506	0.015316	0.000445	36	0.038095	2.13201	0.016411	0.001628	0.015498	0.001511	22
LUSC	Proportion: Stroma neighbourhood (kn2)	Base cell type + metabolic tumour	Glutamine import	0.008658	-2.56205	0.00293711	0.017952	0.003159	0.012183	2	0.009524	-2.55841	0.001933	0.019622	0.002316	0.015521	0
LUSC	Proportion: Stroma neighbourhood (kn2)	Metabolism only	Glycolytic Glutamine import	0.012907	-2.56205	0.00159128	0.067797	0.002002	0.050898	2	0.019048	-2.34521	0.001404	0.063853	0.000958	0.095253	1
LUSC	Proportion: Stroma neighbourhood (kn2)	Metabolism only	Glutamine import	0.004329	-2.72218	0.0212065	0.171759	0.028234	0.111941	1	0.009524	-2.55841	0.011549	0.109049	0.00927	0.026181	0
LUSC	Proportion: Stroma neighbourhood (kn2)	Metabolism only	Lipid Oxidation PPP	0.015152	2.40192	0.0547494	0.00769	0.053572	0.010069	33	0.019048	2.34521	0.084479	0.011686	0.074572	0.012447	23
LUSC	Proportion: Stroma neighbourhood (kn2)	Metabolism only	Lipid Oxidation PPP Glutamine import	0.041126	2.08167	0.0310044	0.00234	0.044961	0.004339	31	0.038095	2.13201	0.075367	0.009246	0.067382	0.013108	22
LUSC	Proportion: Stroma neighbourhood (kn2)	Base cell type + metabolism	Other Stromal cellsLipid Oxidation PPP	0.007796	2.72218	0.0107587	0.000919	0.011504	0.001316	35	0.009524	2.55841	0.016385	0.00088	0.008863	0.000806	24
LUSC	Proportion: Stroma neighbourhood (kn2)	Base cell type + metabolism	Vessels Lipid Oxidation PPP	0.019373	2.40192	0.00539768	0.000648	0.004599	0.00127	33	0.013062	2.55841	0.002828	0.000354	0.001637	0.000513	24
LUSC	Proportion: Stroma neighbourhood (kn2)	Base cell type + metabolism	Fibroblast Lipid Oxidation PPP Glutamine import	0.010065	2.56205	0.00790632	8.83e-05	0.014006	0.000216	34	0.042197	2.13201	0.023251	0.001567	0.027826	0.00236	22
LUSC	Proportion: Stroma neighbourhood (kn2)	Base cell type + metabolism	CD4 cells Lipid Oxidation PPP	0.043826	2.08167	0.00820212	0.000391	0.009282	0.000618	31	0.013062	2.55841	0.012205	0.00037	0.009679	0.000435	24
LUSC	Proportion: Stroma neighbourhood (kn2)	Base cell type + metabolism	Macrophages Glycolytic Glutamine import	0.004772	-2.88231	0.000161209	0.008715	0.000242	0.007329	0	0.040324	-2.13201	6.89e-05	0.008361	0.000138	0.015687	2
LUSC	Proportion: Stroma neighbourhood (kn2)	Base cell type + metabolism	Macrophages Glutamine import	0.004998	-2.88231	0.00213075	0.025344	0.003251	0.021827	0	0.009524	-2.55841	0.001375	0.012802	0.001302	0.006449	0
LUSC	Proportion: Stroma neighbourhood (kn2)	Base cell type + metabolism	Tumour Glutamine import	0.008658	-2.56205	0.00293711	0.017952	0.003159	0.012183	2	0.009524	-2.55841	0.001933	0.019622	0.002316	0.015521	0
LUSC	Proportion: Stroma neighbourhood (kn2)	Base cell type + metabolism	Vessels Glycolytic Glutamine import	0.019373	-2.40192	0.000560729	0.004084	0.001198	0.003556	3	0.013062	-2.55841	3.39e-05	0.001786	6.79e-05	0.001505	0
LUSC	Proportion: Stroma neighbourhood (kn2)	Base cell type + metabolism	CD8 cells Lipid Oxidation PPP Glutamine import	0.026279	2.16173	0.000828146	2.49e-05	0.001015	6.1e-05	31.5	0.040324	2.13201	0.004362	0.000618	0.003479	0.000926	22
LUSC	Proportion: Stroma neighbourhood (kn2)	Base cell type + metabolism	Fibroblast Glutamine import	0.008127	-2.72218	0.00186334	0.020077	0.003302	0.012573	1	0.009524	-2.55841	0.002096	0.01801	0.00217	0.010458	0
LUSC	Proportion: Stroma neighbourhood (kn2)	Base cell type + metabolism	Fibroblast Oxidative Stress PPP	0.006151	2.72218	0.00125336	7.63e-05	0.000797	0.000187	35	0.036643	2.13201	0.001864	0.000192	0.0016	0.000305	22
LUSC	Proportion: Stroma neighbourhood (kn2)	Broad (Structural/immune/tumour) + functional	Immune Cell PDL1 HLADR HLAA	0.043826	-2.08167	0.00078836	0.004593	0.000858	0.003244	5	0.013922	-2.55841	0.000151	0.00481	0.000177	0.003887	0
LUSC	Proportion: Tumour neighbourhood (kn2)	Broad (Structural/immune/tumour) + functional	Structural Cell PDL1	0.012436	-2.56205	0.000280331	0.003294	0.00058	0.004494	2	0.047733	-2.02541	2.45e-05	0.006116	4.9e-05	0.010611	2.5
LUSC	Proportion: Stroma neighbourhood (kn2)	Broad (Structural/immune/tumour) + functional	Structural Cell PD1	0.018101	2.40192	0.0726139	0.000589	0.072857	0.001203	33	0.019048	2.34521	0.079895	0.002634	0.084028	0.003707	23
LUSC	Proportion: Stroma neighbourhood (kn2)	Broad (Structural/immune/tumour) + functional	Structural Cell PD1 ICOS	0.006151	2.72218	0.00780842	4.98e-05	0.007545	0.000122	35	0.013922	2.55841	0.007091	0.000377	0.006064	0.000419	24
LUSC	Proportion: Stroma neighbourhood (kn2)	Broad (Structural/immune/tumour) + functional	Immune Cell PD1 ICOS	0.019373	2.40192	0.0141106	0.000509	0.01399	0.000666	33	0.038095	2.13201	0.015574	0.001464	0.014616	0.001382	22
LUSC	G-cross AUC	Base cell type + metabolic tumour	Glycolytic PPP Glutamine import to Glutamine import	0.009524	-2.55841	307.825	458.794	62.6928	18.1383	0	0.035714	-2.23607	404.1	464.182	5.63045	20.8492	0
LUSC	G-cross AUC	Base cell type + metabolic tumour	Glycolytic PPP Glutamine import to PPP Glutamine import	0.017316	-2.37346	372.636	450.723	50.3515	37.5307	2	0.031746	-2.20454	375.026	458.33	54.0367	44.3583	1
LUSC	G-cross AUC	Base cell type + metabolic tumour	PPP to Glutamine import	0.004329	-2.73861	280.56	465.449	28.6613	17.4341	0	0.019048	-2.34521	340.764	457.911	143.877	21.6959	1
LUSC	G-cross AUC	Base cell type + metabolic tumour	PPP Glutamine import to Glutamine import	0.004329	-2.73861	347.601	465.331	87.7964	17.644	0	0.019048	-2.34521	335.4	461.209	101.344	26.4968	1
LUSC	G-cross AUC	Metabolism only	Glutamine import to Glutamine import	0.015152	-2.40192	459.403	485.629	18.208	4.99403	3	0.019048	-2.34521	440.269	484.524	67.5493	3.14858	1
LUSC	G-cross AUC	Metabolism only	Glycolytic PPP to Glutamine import	0.004329	-2.72218	410.995	465.943	39.9408	18.4574	1	0.019048	-2.34521	378.438	467.965	64.3811	11.445	1
LUSC	G-cross AUC	Metabolism only	Glycolytic PPP to Glycolytic Glutamine import	0.019048	-2.34521	307.82	454.808	127.835	24.1318	1	0.038095	-2.13201	321.661	452.614	87.8915	30.5286	2
LUSC	G-cross AUC	Metabolism only	Glycolytic PPP Glutamine import to Glycolytic Glutamine import	0.009524	-2.55841	295.443	464.083	118.271	23.4146	0	0.019048	-2.34521	287.818	448.351	122.493	48.7463	1
LUSC	G-cross AUC	Metabolism only	Lipid Oxidation to Glutamine import	0.015152	-2.40192	409.588	472.719	41.0295	14.2537	3	0.009524	-2.55841	413.983	465.72	50.127	6.22302	0
LUSC	G-cross AUC	Metabolism only	Lipid Oxidation to Glycolytic Glutamine import	0.019048	-2.34521	328.09	439.837	60.4828	41.7415	1	0.038095	-2.13201	304.634	408.106	78.6132	62.4293	2
LUSC	G-cross AUC	Metabolism only	Lipid Oxidation Glutamine import to Glutamine import	0.008658	-2.55604	443.644	482.799	21.2538	6.99166	1	0.009524	-2.55841	411.719	476.855	47.1587	9.28775	0
LUSC	G-cross AUC	Metabolism only	Lipid Oxidation PPP to Glutamine import	0.025974	-2.24179	400.901	466.722	44.9792	15.6462	4	0.015873	-2.44949	406.956	461.45	41.3284	10.3184	0
LUSC	G-cross AUC	Metabolism only	Lipid Oxidation PPP Glutamine import to Glutamine import	0.008127	-2.72218	405.919	478.863	51.8003	11.4896	1	0.009524	-2.55841	397.687	471.273	39.5383	9.10717	0
LUSC	G-cross AUC	Metabolism only	Lipid Oxidation PPP Glutamine import to Glycolytic Glutamine import	0.02381	-2.32379	301.582	454.455	50.448	43.4068	0	0.019048	-2.34521	289.858	428.146	90.5323	54.6435	1
LUSC	G-cross AUC	Metabolism only	Oxidative Stress to Glutamine import	0.019048	-2.34521	425.943	481.51	26.9372	16.7134	1	0.015873	-2.44949	414.644	469.235	61.0228	4.9025	0
LUSC	G-cross AUC	Metabolism only	Oxidative Stress Glutamine import to Glutamine import	0.017316	-2.37346	431.909	483.611	41.7167	6.52297	2	0.031746	-2.20454	424.341	475.566	44.4053	9.93307	1
LUSC	G-cross AUC	Metabolism only	Oxidative Stress PPP to Glutamine import	0.047619	-2.06559	421.297	483.562	37.8591	11.2829	1	0.028571	-2.3094	412.16	460.008	44.9184	8.13244	0
LUSC	G-cross AUC	Metabolism only	Oxidative Stress PPP to Oxidative Stress Glutamine import	0.02381	-2.32379	265.443	477.863	115.63	6.20511	0	0.028571	-2.3094	384.916	454.305	27.8519	23.9663	0
LUSC	G-cross AUC	Metabolism only	Oxidative Stress PPP Glutamine import to Glutamine import	0.017316	-2.37346	431.913	483.854	35.6204	9.19456	2	0.015873	-2.44949	415.06	472.959	61.23	12.1255	0
LUSC	G-cross AUC	Metabolism only	PPP to Glutamine import	0.025974	-2.24179	408.197	469.841	47.7117	12.0288	4	0.019048	-2.34521	402.351	468.076	39.2871	14.3173	1
LUSC	G-cross AUC	Metabolism only	PPP to Glycolytic Glutamine import	0.019048	-2.34521	306.005	443.623	93.6799	32.5379	1	0.038095	-2.13201	330.356	431.925	70.242	37.6392	2
LUSC	G-cross AUC	Metabolism only	PPP Glutamine import to Glutamine import	0.008658	-2.56205	425.224	476.161	32.2963	13.201	2	0.019048	-2.34521	389.01	471.581	48.0835	15.0733	1
LUSC	G-cross AUC	Metabolism only	PPP Glutamine import to Lipid Oxidation PPP	0.008658	2.55604	452.611	318.149	20.6391	129.736	29	0.031746	2.20454	455.099	371.101	17.9779	83.1608	19
LUSC	G-cross AUC	Metabolism only	Phenotype to Glutamine import	0.015152	-2.40192	404.043	473.778	53.4373	12.9507	3	0.009524	-2.55841	421.854	472.168	57.194	5.15809	0
LUSC	G-cross AUC	Base cell type + metabolism	CD4 cellsGlycolytic Glutamine import to Other Stromal cellsGlycolytic PPP Glutamine import	0.035714	2.23607	455	359.569	30	46.5934	15	0.015873	2.44949	416.323	350.349	33.1823	26.7393	20
LUSC	G-cross AUC	Base cell type + metabolism	CD4 cellsGlycolytic PPP Glutamine import to MacrophagesGlutamine import	0.02381	-2.32379	342.823	454.028	25.2972	22.8029	0	0.035714	-2.23607	198.736	421.865	102.348	31.3583	0
LUSC	G-cross AUC	Base cell type + metabolism	CD4 cellsLipid Oxidation to CD8 cellsGlutamine import	0.031746	-2.20454	340.141	454.553	94.3335	29.8856	1	0.02381	-2.32379	255.655	431.272	130.953	21.9809	0
LUSC	G-cross AUC	Base cell type + metabolism	CD4 cellsLipid Oxidation to FibroblastGlutamine import	0.031746	-2.19338	304.248	431.967	119.817	55.6288	2	0.035714	-2.23607	284.349	417.562	79.2431	20.418	0
LUSC	G-cross AUC	Base cell type + metabolism	CD4 cellsPPP to FibroblastGlutamine import	0.015873	-2.44949	274.952	447.694	115.817	25.3812	0	0.035714	-2.23607	287.71	443.75	109.722	20.0083	0
LUSC	G-cross AUC	Base cell type + metabolism	CD4 cellsPhenotype to FibroblastGlutamine import	0.030303	-2.19089	291.744	429.123	115.166	39.9707	3	0.02381	-2.32379	309.092	435.161	90.8693	23.249	0
LUSC	G-cross AUC	Base cell type + metabolism	CD8 cellsGlycolytic PPP Glutamine import to Other Stromal cellsGlutamine import	0.035714	-2.23607	334.404	432.02	34.1462	29.6857	0	0.047619	-2.06559	344.336	445.358	81.5625	36.2825	1
LUSC	G-cross AUC	Base cell type + metabolism	CD8 cellsLipid Oxidation to CD8 cellsGlutamine import	0.015873	-2.44949	247.605	469.575	144.344	14.445	0	0.035714	-2.23607	235.452	429.125	163.288	20.6483	0
LUSC	G-cross AUC	Base cell type + metabolism	CD8 cellsLipid Oxidation to FibroblastGlutamine import	0.015873	-2.44949	273.816	446.569	117.038	21.6151	0	0.035714	-2.23607	263.544	414.643	80.0301	24.054	0
LUSC	G-cross AUC	Base cell type + metabolism	CD8 cellsPPP to TumourGlutamine import	0.004329	-2.73861	281.077	444.451	107.445	6.99571	0	0.015873	-2.44949	354.627	448.561	61.0367	26.9315	0
LUSC	G-cross AUC	Base cell type + metabolism	CD8 cellsPhenotype to CD4 cellsGlutamine import	0.038095	-2.13201	331.085	435.491	84.3026	36.4468	2	0.009524	-2.55841	310.172	428.312	45.311	36.77	0
LUSC	G-cross AUC	Base cell type + metabolism	CD8 cellsPhenotype to CD8 cellsGlutamine import	0.015873	-2.44949	282.071	462.52	105.767	12.5449	0	0.02381	-2.32379	239.821	429.591	179.378	35.3506	0
LUSC	G-cross AUC	Base cell type + metabolism	CD8 cellsPhenotype to FibroblastGlutamine import	0.008658	-2.55604	255.764	445.939	112.116	24.1739	1	0.02381	-2.32379	310.517	430.346	56.4425	28.126	0
LUSC	G-cross AUC	Base cell type + metabolism	CD8 cellsPhenotype to MacrophagesGlutamine import	0.019048	-2.34521	276.747	446.243	146.723	11.994	1	0.02381	-2.32379	326.898	422.508	28.5345	20.993	0
LUSC	G-cross AUC	Base cell type + metabolism	FibroblastGlycolytic PPP Glutamine import to FibroblastGlutamine import	0.015873	-2.44949	292.468	418.439	72.351	20.9041	0	0.035714	-2.23607	304.321	432.812	45.7418	16.8718	0
LUSC	G-cross AUC	Base cell type + metabolism	FibroblastLipid Oxidation to FibroblastGlutamine import	0.031746	-2.20454	245.142	447.998	132.486	16.3865	1	0.035714	-2.23607	294.478	431.37	111.06	10.3656	0
LUSC	G-cross AUC	Base cell type + metabolism	FibroblastPPP Glutamine import to FibroblastGlutamine import	0.030303	-2.19089	310.669	442.001	77.4455	25.4313	3	0.02381	-2.32379	277.946	438.299	77.8548	15.8324	0
LUSC	G-cross AUC	Base cell type + metabolism	FibroblastPhenotype to FibroblastGlutamine import	0.030303	-2.19089	283.22	436.193	92.0066	27.3656	3	0.02381	-2.32379	313.996	447.089	90.8384	12.8592	0
LUSC	G-cross AUC	Base cell type + metabolism	MacrophagesLipid Oxidation to CD8 cellsGlutamine import	0.015873	-2.44949	265.264	460.907	129.586	16.4953	0	0.02381	-2.32379	231.339	416.639	146.511	41.8484	0
LUSC	G-cross AUC	Base cell type + metabolism	MacrophagesPhenotype to CD8 cellsGlutamine import	0.031746	-2.20454	284.426	442.286	113.053	16.7504	1	0.02381	-2.32379	258.841	416.031	106.205	38.6847	0
LUSC	G-cross AUC	Base cell type + metabolism	MacrophagesPhenotype to FibroblastGlutamine import	0.030303	-2.19089	263.158	427.724	112.201	24.9005	3	0.02381	-2.32379	305.887	427.164	64.8161	22.0467	0
LUSC	G-cross AUC	Base cell type + metabolism	MacrophagesPhenotype to MacrophagesGlutamine import	0.038095	-2.13201	276.156	434.386	154.131	21.4384	2	0.02381	-2.32379	335.24	427.163	41.397	13.944	0
LUSC	G-cross AUC	Base cell type + metabolism	Other Stromal cellsGlutamine import to CD8 cellsGlutamine import	0.031746	-2.20454	315.817	442.065	105.823	22.4521	1	0.047619	-2.06559	211.997	409.766	184.321	61.1452	1
LUSC	G-cross AUC	Base cell type + metabolism	Other Stromal cellsGlutamine import to FibroblastGlutamine import	0.030303	-2.19089	341.946	446.568	69.3511	18.8632	3	0.02381	-2.32379	321.958	447.517	64.5912	12.3485	0
LUSC	G-cross AUC	Base cell type + metabolism	Other Stromal cellsGlycolytic PPP Glutamine import to FibroblastGlutamine import	0.030303	-2.19089	307.55	431.452	77.7858	31.5969	3	0.035714	-2.23607	262.455	428.522	74.2542	27.8737	0
LUSC	G-cross AUC	Base cell type + metabolism	Other Stromal cellsLipid Oxidation to CD8 cellsGlutamine import	0.015873	-2.44949	274.007	466.567	116.207	27.4855	0	0.02381	-2.32379	302.534	425.89	11.5175	43.2747	0
LUSC	G-cross AUC	Base cell type + metabolism	Other Stromal cellsLipid Oxidation to FibroblastGlutamine import	0.030303	-2.19089	263.531	407.856	115.387	66.5872	3	0.035714	-2.23607	280.051	433.331	54.2589	14.6259	0
LUSC	G-cross AUC	Base cell type + metabolism	Other Stromal cellsLipid Oxidation to TumourGlutamine import	0.002165	-2.88231	289.08	458.445	97.6925	10.3771	0	0.038095	-2.13201	324.757	417.566	99.1876	40.8951	2
LUSC	G-cross AUC	Base cell type + metabolism	Other Stromal cellsPhenotype to FibroblastGlutamine import	0.017316	-2.37346	268.334	437.264	104.885	24.5606	2	0.02381	-2.32379	332.318	444.614	91.1937	17.0559	0
LUSC	G-cross AUC	Base cell type + metabolism	TumourGlycolytic PPP Glutamine import to TumourGlutamine import	0.009524	-2.55841	307.825	458.794	62.6928	18.1383	0	0.035714	-2.23607	404.1	464.182	5.63045	20.8492	0
LUSC	G-cross AUC	Base cell type + metabolism	TumourGlycolytic PPP Glutamine import to TumourPPP Glutamine import	0.017316	-2.37346	372.636	450.723	50.3515	37.5307	2	0.031746	-2.20454	375.026	458.33	54.0367	44.3583	1
LUSC	G-cross AUC	Base cell type + metabolism	TumourLipid Oxidation to CD8 cellsGlutamine import	0.031746	-2.20454	280.973	432.835	81.9934	29.5793	1	0.02381	-2.32379	210.373	408.429	115.654	51.7392	0
LUSC	G-cross AUC	Base cell type + metabolism	TumourPPP to TumourGlutamine import	0.004329	-2.73861	280.56	465.449	28.6613	17.4341	0	0.019048	-2.34521	340.764	457.911	143.877	21.6959	1
LUSC	G-cross AUC	Base cell type + metabolism	TumourPPP Glutamine import to MacrophagesGlutamine import	0.047619	-2.06559	318.359	402.701	63.5868	26.7727	1	0.035714	-2.23607	291.893	410.087	58.1539	31.8375	0
LUSC	G-cross AUC	Base cell type + metabolism	TumourPPP Glutamine import to TumourGlutamine import	0.004329	-2.73861	347.601	465.331	87.7964	17.644	0	0.019048	-2.34521	335.4	461.209	101.344	26.4968	1
LUSC	G-cross AUC	Base cell type + metabolism	VesselsLipid Oxidation to CD8 cellsGlutamine import	0.015873	-2.44949	267.18	459.441	118.27	14.8678	0	0.035714	-2.23607	208.867	421.463	128.209	14.987	0
LUSC	G-cross AUC	Base cell type + metabolism	VesselsLipid Oxidation to FibroblastGlutamine import	0.030303	-2.19089	258.594	427.472	112.285	46.199	3	0.035714	-2.23607	233.361	414.407	33.9762	25.0485	0
LUSC	G-cross AUC	Base cell type + metabolism	VesselsLipid Oxidation to MacrophagesGlutamine import	0.038095	-2.13201	272.126	432.038	130.662	45.9751	2	0.035714	-2.23607	323.49	414.344	53.806	20.6655	0
LUSC	G-cross AUC	Base cell type + metabolism	VesselsPPP to FibroblastGlutamine import	0.030303	-2.19089	309.825	420.611	78.2669	41.7562	3	0.038056	-2.19469	283.629	410.077	79.9942	31.7519	0.5
LUSC	G-cross AUC	Base cell type + metabolism	VesselsPhenotype to FibroblastGlutamine import	0.030303	-2.19089	264.132	436.262	102.962	26.1045	3	0.02381	-2.32379	269.084	434.455	56.7177	18.414	0
LUSC	G-cross AUC	Base cell type + metabolism	VesselsPhenotype to MacrophagesGlutamine import	0.019048	-2.34521	262.234	434.23	150.877	37.9099	1	0.02381	-2.32379	292.823	424.553	49.3627	18.6671	0
LUSC	Proportion: whole core	Base cell type + metabolism	CD4 cellsGlycolytic Glutamine import	0.012907	-2.56205	0.000168758	0.0043	0.000168	0.007229	2	0.038095	-2.13201	0.000227	0.001883	0.000107	0.001932	2
LUSC	Proportion: whole core	Base cell type + metabolism	CD4 cellsLipid Oxidation PPP	0.007796	2.72218	0.00572907	8.23e-05	0.008519	0.000109	35	0.013062	2.55841	0.007323	0.000214	0.009087	0.000307	24
LUSC	Proportion: whole core	Base cell type + metabolism	FibroblastGlutamine import	0.015152	-2.40192	0.00205852	0.010493	0.003382	0.007478	3	0.009524	-2.55841	0.001976	0.011301	0.002452	0.005559	0
LUSC	Proportion: whole core	Base cell type + metabolism	FibroblastLipid Oxidation PPP	0.034087	2.16173	0.00694702	0.000215	0.008852	0.000306	31.5	0.042197	2.13201	0.010858	0.000799	0.010193	0.001086	22
LUSC	Proportion: whole core	Base cell type + metabolism	MacrophagesGlutamine import	0.025974	-2.24179	0.00242764	0.009294	0.003353	0.005169	4	0.009524	-2.55841	0.001268	0.008078	0.001286	0.00357	0
LUSC	Proportion: whole core	Base cell type + metabolism	MacrophagesGlycolytic Glutamine import	0.007796	-2.72218	0.000153041	0.005207	0.00023	0.004557	1	0.040324	-2.13201	8.76e-05	0.005257	0.000175	0.00837	2
LUSC	Proportion: whole core	Base cell type + metabolism	Other Stromal cellsLipid Oxidation PPP	0.004998	2.88231	0.00660519	0.000371	0.004575	0.000519	36	0.009524	2.55841	0.009446	0.000558	0.006591	0.0005	24
LUSC	Proportion: whole core	Base cell type + metabolism	Other Stromal cellsLipid Oxidation PPP Glutamine import	0.027768	2.24179	0.00652649	0.000155	0.009144	0.00026	32	0.009524	2.55841	0.012133	0.000563	0.008758	0.000679	24
LUSC	Proportion: whole core	Base cell type + metabolism	VesselsLipid Oxidation PPP	0.012436	2.56205	0.00397767	0.000219	0.004292	0.000425	34	0.042197	2.13201	0.001414	0.000303	0.000765	0.000396	22
LUSC	Proportion: whole core	Metabolism only	Glutamine import	0.008658	-2.56205	0.0254207	0.247388	0.029482	0.210503	2	0.019048	-2.34521	0.025871	0.138944	0.022964	0.089702	1

## Sheet: Supplementary_table3
Supplementary Table 3: Differential Expression Analysis results for the RNA GeoMx assay. The number of differentially expression proteins for the tested contrast between different cancer subtypes, between Relapse and Non-Relapse or between GNN-predicted relapse and non-relapse either in all samples or within Tumour or non-tumour segments. Limma-voom ebayes (with TREAT) pipeline used with a signif…
		LUAD vs LUSC		18672	markers
		Tumour	Non-tumour
	ebayes with TREAT	t_avs	s_avs
	Down	230	5
	Up	369	0
	Total	599	5
		Relapse vs Non-Relapse
		LUAD	LUSC	BOTH	LUAD	LUSC	BOTH
		Tumour			Non-Tumour
	ebayes	YvN_TumourAdeno	YvN_TumourSquamous	YvN_Tumour	YvN_StromaAdeno	YvN_StromaSquamous	YvN_Stroma
	Down	1	5	1	0	0	0
	Up	0	28	2	0	0	0
	Total	1	33	3	0	0	0
		GNN-predicted Relapse vs Non-Relapse
		LUAD	LUSC	BOTH	LUAD	LUSC	BOTH
		Tumour			Non-Tumour
	ebayes	YvN_TumourAdeno	YvN_TumourSquamous	YvN_Tumour	YvN_StromaAdeno	YvN_StromaSquamous	YvN_Stroma
	Down	0	4	5	2	0	0
	Up	4	13	12	1	4	1
	Total	4	17	17	3	4	1
